# Supplementary material for: Involvement of Fenton chemistry in rice straw degradation by the lignocellulolytic bacterium Pantoea ananatis Sd-1
Source: PubMed Central journal article supplement (PMC5054592; doi:10.1186/s13068-016-0623-x), 2016-10-06
Supplement: 13068_2016_623_MOESM3_ESM.pdf [file 13068_2016_623_MOESM3_ESM.pdf]

**Table S1** Sugars, furfural and 5-hydroxymethylfurfural (HMF) derived from rice straw during the *P. ananatis* Sd-1 and Fenton reagent treatment.

|                            | <b>Time</b> | <b>Glucose (g/l)</b> | <b>Xylose (g/l)</b> | <b>Arabinose (g/l)</b> | <b>Furfural (g/l)</b> | <b>HMF (g/l)</b> |
|----------------------------|-------------|----------------------|---------------------|------------------------|-----------------------|------------------|
| <b>RS</b>                  | <b>1 d</b>  | 0.0245               | 0.0272              | 0.0153                 | 0.037                 | ND <sup>a</sup>  |
|                            | <b>2 d</b>  | 0.0421               | 0.0187              | 0.0386                 | 0.018                 | ND               |
|                            | <b>3 d</b>  | 0.0353               | 0.0318              | 0.0175                 | ND                    | ND               |
|                            | <b>4 d</b>  | 0.0482               | 0.0230              | 0.0336                 | ND                    | ND               |
|                            | <b>5 d</b>  | 0.0360               | 0.0194              | 0.0227                 | ND                    | ND               |
|                            | <b>6 d</b>  | 0.0251               | 0.0283              | 0.0346                 | ND                    | ND               |
| <b>RS + DMSO</b>           | <b>1 d</b>  | 0.0147               | 0.0182              | 0.0232                 | ND                    | ND               |
|                            | <b>2 d</b>  | 0.0129               | 0.0256              | 0.0317                 | ND                    | ND               |
|                            | <b>3 d</b>  | 0.0244               | 0.0187              | 0.0239                 | ND                    | ND               |
|                            | <b>4 d</b>  | 0.0355               | 0.0221              | 0.0141                 | ND                    | ND               |
|                            | <b>5 d</b>  | 0.0192               | 0.0205              | 0.0201                 | ND                    | ND               |
|                            | <b>6 d</b>  | 0.0186               | 0.0237              | 0.0262                 | ND                    | ND               |
| <b>Control<sup>b</sup></b> |             | 0.0115               | ND                  | ND                     | ND                    | ND               |
| <b>Fenton reagent</b>      | <b>2 h</b>  | 0.0354               | 0.0266              | 0.0223                 | 0.195                 | 0.137            |

<sup>a</sup> Not detected

<sup>b</sup> Non-inoculated cultures
