# Supplementary material for: Involvement of Fenton chemistry in rice straw degradation by the lignocellulolytic bacterium Pantoea ananatis Sd-1
Source: PubMed Central journal article supplement (PMC5054592; doi:10.1186/s13068-016-0623-x), 2016-10-06
Supplement: 13068_2016_623_MOESM7_ESM.pdf [file 13068_2016_623_MOESM7_ESM.pdf]

**Table S2** Primers used for quantitative real time-PCR

| <b>Gene (CDS no.)</b>                                       | <b>Sequence of 5'</b>  | <b>Sequence of 3'</b>  | <b>Production length</b> |
|-------------------------------------------------------------|------------------------|------------------------|--------------------------|
| GMC family oxidoreductase gene<br>(GenBank: Y903_RS0107765) | TTCCAGGACC<br>TGTCTAAG | TACGCAGTTT<br>CAGCTCTA | 169 bp                   |
| 16S rRNA gene (GenBank:<br>Y903_RS0109280)                  | AAGTCGGAAT<br>CGCTAGTA | TACGGTTACC<br>TTGTTACG | 182 bp                   |
